# Supplementary material
Source: Springer Nature journal article supplement (https://www.springermedizin.de/resource/supplementary/12876_2007_242_MOESM2_ESM.pdf/9439108)

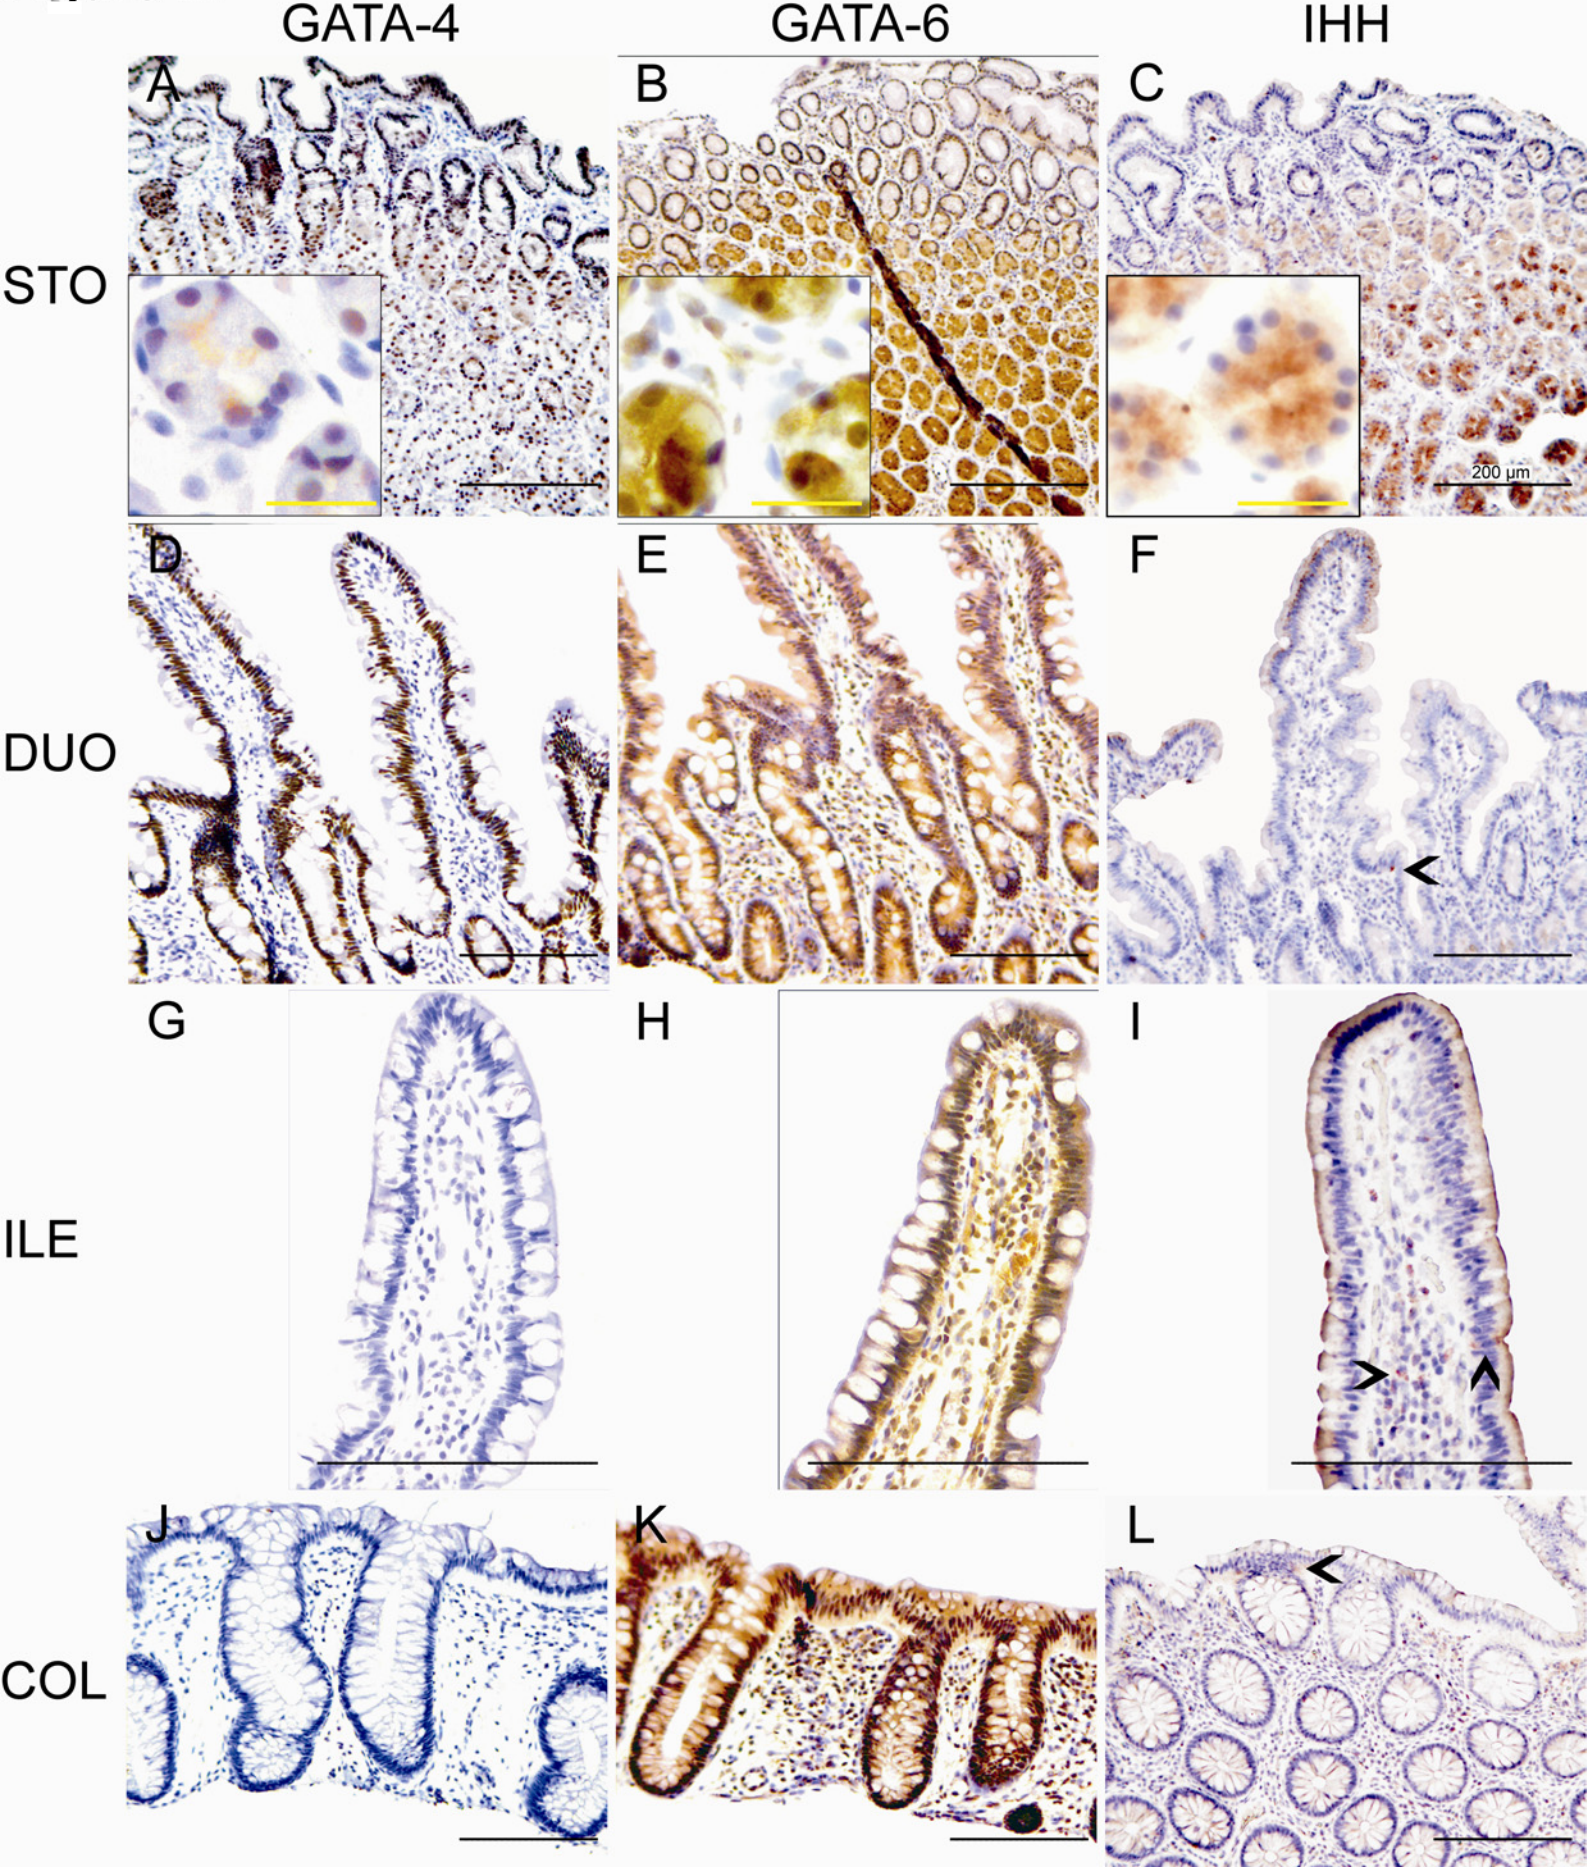

Supplement: MOESM2 [file 9439108]
